# Supplementary material for: Measuring Animal Age with DNA Methylation: From Humans to Wild Animals
Source: Front Genet. 2017 Aug 17;8:106. doi: 10.3389/fgene.2017.00106 (PMC5572392; doi:10.3389/fgene.2017.00106)
Supplement: Supplementary file 1 [file Table1.XLSX]

## Sheet: STable1
S.Table 1	Age-related DNA methylation changes in mammals, birds, reptiles and fish
Order	Species	Reference	Tissue	Age range	Gene	CpG (N or ID)	Direction	MAD or error	MAD percentage of max. lifespan	Age relationship
Mammalia
Primates	Homo sapiens Avg. lifespan: 85 years*	Gronniger et al. (2010)	Skin (pilot study)	26 - 35 & 65 - 71 years	-	104	Pos			β-value + 0.2
			Skin (validation)	19 - 72 years	SEC31L2	1	Pos			p(BH) < 0.01
					DDAH2	1	Pos			p(BH) < 0.01
					TET2	1	Pos			p(BH) < 0.01
		Teschendorff et al. (2010)	Blood	52 - 78 years	-	69	Pos			p = 6e-15 (training, pre-treatment), p = 2e-06 (validation, postreatment)
		Bocklandt et al. (2011)	Saliva (model)	21 - 55 years	-	88	Neg = 19, Pos = 69			q-values < 0.05, pred vs obs (r = 0.83, p = 2.2x10-16)
			Saliva (validation)	18 - 70 years	EDARADD	1	Neg			r = -0.81 (twins)
					NPTX2	1	Pos			r = 0.52 (twins)
					TOM1L1	1	Neg			r = -0.70 (twins)
		Koch & Wagner et al. (2011)	Dermis, epidermis, cervical smear, blood. (Training set.)	16 - 72 years	-	5	na	10.3 years	12.11%	Model: N = 5 CpGs, pred vs obs (R2 = 0.65)
			Saliva, blood (cord, peripheral), breast. (Validation set.)	0 - 78 years	-	5	na			Model: N = 5 CpGs, pred vs obs (R2 = 0.68)
					TRIM58	1 (cg07533148)	Pos			r = 0.69 (all training set)
					KCNQ1DN	1 (cg01530101)	Pos			r = 0.63 (all training set)
					NPTX2	1 (cg12799895)	Pos			r = 0.62 (all training set)
					GRIA2	1 (cg25148589)	Pos			r = 0.62 (all training set)
					BIRC4BP	1 (cg23571875)	Neg			r = -0.45 (all training set)
		Garagnani et al. (2012)	Whole blood (training)	42 - 83 (mothers) & 9 - 52 years (offspring)	ELOVL2	1 (cg16867657)	Pos			r = 0.91, p = 3.97e-18
					FHL2	1 (cg06639320)	Pos			r = 0.91, p = 1.82e-18
					PENK	1 (cg16419235)	Pos			r = 0.76, p = 8.10e-15
			Whole & cord blood (validation)	9 - 99 years	ELOVL2	4	Pos			r = 0.92
					FHL2	4	Pos			r = 0.80
					PENK	2	Pos			r = 0.63
		Alisch et al. (2012)	Blood (test)	3 - 17 (mean = 9.9) years	-	2078	Neg = 1601, Pos = 477			FDR < 0.01
			Blood (validation)	1 - 16 (mean = 4.6) years	-	41895	Neg = 35997, Pos = 5898			FDR < 0.01, 62.7% overlap with test set (p < 0.001)
		Hannum et al. (2013)	Whole blood	19 - 101	-	71	na	3.9 years	4.58%	r = 0.963, ± 3.9 years (training), r = 0.905, ± 4.89 years (validation)
			Breast, kidney, lung, skin (multi-tissue validation)	-	-	71	na			r = 0.913, ± 5.71 years
		Horvath (2013)	Multi-tissue: e.g. blood, colon, adipose, liver, lung, saliva	Mean = 43 years	-	353	Neg = 160, Pos = 193	3.6 years	4.23%	r = 0.97, ± 2.9 years (test), r = 0.96, ± 3.6 years (validation)
		Weidner et al. (2014)	Blood	0 - 78 years	-	102	Neg = 58, Pos = 44	3.34 years	3.93%	R2 = 0.98, ± 3.34 years (training), R2 = 0.71 (Hannum (2013) validation)
			Blood (simplified model)	0 - 78 years	-	3	Neg = 2, Pos = 1	5.4 years	6.35%	Model: N = 3 CpGs, ± 5.4 years (training), ± 4.5 years (validation)
					ITGA2B	1 (cg25809905)	Neg			r < -0.85
					ASPA	1 (cg02228185)	Neg			r < -0.85
					PDE4C	1 (cg17861230 + 1)	Pos			r > 0.85
		Zbiec-Piekarska et al. (2015a)	Blood	2 - 75 years	ELOVL2	2 (Chr6:11044634, 11044642)	Pos = 2	5.75 years	6.76%	R2 = 0.859, ± 5.03 years (training), ± 5.75 years (validation)
		Zbiec-Piekarska et al. (2015b)	Blood	2 - 75 years	-	5	na	3.9 years	4.58%	Model: N = 5 CpGs, R2 = 0.94, ± 4.5 years (training), ± 3.9 years (validation)
					ELOVL2	1 (Chr6: 11044661)	Pos			p = 1.1121x10-23
					C1orf132	1 (Chr1: 207823681)	Neg			p = 3.1724x10-23
					TRIM59	1 (Chr3: 160450199)	na			p = 3.3826x10-12
					KLF14	1 (cg14361627)	na			p = 4.353x10-12
					FHL2	1 (Chr2: 105399288)	na			p = 2.3384x10-8
		Bekaert et al. (2015)	Blood	0 - 91 (mean = 44) years	-	4	Neg = 2, Pos = 2	4.96 years	5.83%	Model: N = 4 CpGs, pred vs obs (R = 0.97, p = 1.272e-129, ± 3.75 years, test). R2 = 0.9469, ± 4.96 years, validation)
			Teeth	19 - 70 (mean = 39) years				4.86 years	0.0571	Model: N= 4 CpGs (R2 = 0.74, ± 4.86 years)
					ASPA	1	Neg			CpG1: R2 = 0.65, p = 1.4071e-07
					PDE4C	4	Pos			CpG1: R2 = 0.85, p = 6.0245e-05
					ELOVL2	9	Pos			p = 1.2628e-11
					EDARADD	2	Neg			CpG1: R2 = 0.62, p = 7.4543e-25
					ITGA2B	3	na			R2 < 0.3 (not in model)
		Vidal-Bralo et al (2016)	Blood	20 - 78 years (training)	-	8	Pos	5.07 years	5.96%	R2 = 0.68, ± 5.07 years
				45 - 89 years (MS-SNuPE validation)	-	8	Pos	6.07 years	7.14%	R2 = 0.45, ± 6.07 years
		Christiansen et al. (2016)	Buffy coat	30 - 82 years (twins)	-	Hannum (71 CpGs), Horvath (353 CpGs)	na	5.6, 5.4 years	6.59%, 6.35%	Horvath (2013): r = 0.97, ± 5.6 years, mean = 1.4 years lower than chronological age. Hannum (2013): ± 5.4 years, mean = 3.6 years higher than chronological age
		Eipel et al. (2016)	Buccal cells	1 - 85 years	-	5	Neg = 3, Pos = 2			Model = "5 CpGs" (Buccal-Cell-Signature) pred vs obs, ± 4.66 years, R2 = 0.93 (training), ± 5.09 years, R2 = 0.93 (validation)
		Mawlood et al. (2016)	Blood	18 - 91 years	-	2	Neg = 2	9.3 years	10.9%	Model = 2 CpGs, pred vs obs: R2 = 0.509, ± 9.3 years
					M1215	1	Neg			r = -0.322, p = 0.043
					M1313	1	Neg			r = -0.383, p = 0.015
	Pan troglodytes Max lifespan: 59.4 years	Horvath (2013), Pai et al. (2011)	Heart	~ 10 - 42 years (captive)	-	353	Neg = 160, Pos = 193	10 years	16.83%	r = 0.84, p = 0.00063, ± 10 years
			Kidney, liver	~ 9 - 46 years (captive)	-			3.7 years	6.23%	r = 0.75, p = 5.8e-05, ± 3.7 years
		Horvath (2013), Hernando-Herraez et al. (2013)	Blood	~ 9 - 34 years (wild born)	-	353	Neg = 160, Pos = 193			r = 0.93, p = 0.022
	Pan paniscus Max lifespan: 55 years	Horvath (2013), Hernando-Herraez et al. (2013)	Blood	~ 15 - 22 years (wild born)	-	353	Neg = 160, Pos = 193	1.4 years	2.54%	r = 0.84, p = 0.036, ± 1.4 years
	Gorilla gorilla Max lifespan: 60.1 years	Horvath (2013), Hernando-Herraez et al. (2013)	Blood	~ 16 - 44 years (wild born)	-	353	Neg = 160, Pos = 193	14 years	23.29%	r = 0.51, p = 0.3, ± 14 years
Rodentia	Mus musculus	Maegawa et al. (2010)	Small intestine	3 - 35 months	DOK5	na	Pos			r = 1.00, p < 0.001
					MYOD1	na	Pos			r = 1.00, p < 0.001
					CDKN2A	na	Pos			r = 0.96, p = 0.003
					IGF2	na	Pos			r = 0.86, p = 0.024
					NKX2	na	Pos			r = 0.86, p < 0.001
	C57BL/6J	Spiers et al. (2015)	Blood, lung, cerebellum and hippocampus	17 (embryonic) - 630 days	ELOVL2	2	Pos			p = 1.15e-04 (blood)
					GLRA1	2	Pos			p = 3.31e-06 (blood)
					MYOD1	1	Pos			p = 2.8e-06 (blood)
					PDE4C	2	Pos			p = 2.1e-06 (cerebellum)
	C57BL/6-BABR Avg. lifespan >100 weeks*	Stubbs et al. (2017)	Multi-tissue: liver, lung, heart and brain	Newborn - 41 weeks old	-	329	na	3.3 weeks (training)	3.33%	r = 0.839 (training set)
	Rattus norvegicus	Penner et al. (2016)	Hippocampus	9 - 12 months (adult), 24 - 32 months (aged)	EGR1	20	Pos			Averaged % methylation of 20 promoter CpGs showed higher methylation in aged rats (p = 0.021)
Cetacea	Megaptera novaengliae Max lifespan: 95 years	Polanowski et al. (2014)	Skin	<1 - 30 years	-	3	Neg = 1, Pos = 2	3.75 years	3.95%	Model: N = 3 CpGs, pred vs obs (R2 = 0.787, ± 2.991 years)
					TET2	1	Neg			R2 = 0.455, p = 2.26e-07
					CDKN2A	1	Pos			R2 = 0.471, p = 1.16e-07
					GRIA2	1	Pos			R2 = 0.568, p = 1.38e-09
Carnivora	Canis lupus familiaris Max lifespan: 24 years	Gryzinska et al. (2016)	Blood	2 months - 14 years	Global	-	Pos			Relative methylation level: 43.5% (<= 9 months) - 81.29% (> 8 years)
		Ito et al. (2017)	Blood	0 - 16.6 years	-	4 or 2	Neg = 2, Pos = 2	34.3, 23.1 months	11.88%, 8%	Model: N = 4 CpGs, MAD = 34.3 months, N = 2 CpGs, MAD = 23.1 months
					GSE1	1 (cg07082267)	Neg			R2 = 0.236, p = 0.001
					SCGN	1 (cg06493994)	Pos			R2 =0.066, p = 0.101
					BCL6B	1 (cg10137837)	Neg			R2 = 0.049, p = 0.160
					POU4F2	1 (cg05991454)	Pos			R2 = 0.136, p = 0.016
Aves
Galliformes	Gallus gallus	Gryzinska et al. (2013)	Blood	1 day - 32 weeks	Global	-	Neg			Methylation level: 29.89% (chick) - 18.56% (adult), p = 0.036
		Sun et al. (2014)	Abdominal fat	2, 3 and 7 weeks	PPARγ	6	Neg			% methylation of 6 CpG sites in promoter associated with age (p < 0.0001)
		Zhang et al. (2017)	Breast tissue	20 and 55 weeks	Global (selected DMRs)	-	Pos			Increased global DNAm levels in 55-week-old versus 20-week-old across 2714 differentially methylated regions.
					ABCA1	Promoter	Pos			358 differentially methylated genes, 334 Pos, 45 Neg.
					COL6A1	Promoter	Pos
					GSTT1L	Promoter	Pos
	Coturnix japonica	Andraszek et al. (2014)	Spermatocytes	15 & 52 weeks	RN28S	na	Neg			Higher intensity band in 15 wk old animals (MSP: qualitative)
Reptilia
Crocodilia	Alligator mississippiensis	Nilsen et al. (2016)	Blood	Snout-vent-length: (sub-adult and adult)	Global	na	Neg			R2 = 0.04, p = 0.03
Actinopterygii
Cypriniformes	Danio rerio	Shimoda et al. (2014)	Muscle	2-day embryo, 3, 18 and 30 months	Global	na	Neg			Age-dependent genomic hypomethylation visualised on agarose gel following enzyme cleavage.
			Brain, liver	1, 3 & 30 months	EF1α2	na	na (liver), Neg (brain)			p < 0.05 (1m & 3m, liver), p < 0.05 (all ages, brain)
					FLI1A	na	Neg (liver), na (brain)			p < 0.05 (1m & 3m, liver)
					FGF3	na	Neg (both)			p < 0.05 (all ages, liver and brain)
*Note that for humans and mouse studies the average lifespan is shown.
